# Supplementary material for: Modified Natural Dolomite and Its Influence on the Production of Glycerol Carbonate: Effects of Structural and Basicity Properties
Source: MDPI journal article supplement (doi:10.3390/ma14092358), 2021-05-01
Supplement: s1 [file s1]

Supplementary material

# Modified Natural Dolomite for the Catalytic Production of Glycerol Carbonate: Effects of Structural and Textural Properties

Julio González-García <sup>1,2,\*</sup>, Lifang Chen <sup>3,\*</sup>, Omar Campuzano-Calderon <sup>1</sup>, Sara Núñez-Correa <sup>1,4</sup>, Enrique A. López-Guajardo <sup>1</sup>, Jin An Wang <sup>3</sup> and Alejandro Montesinos-Castellanos <sup>1,\*</sup>

<sup>1</sup> Tecnológico de Monterrey, Escuela de Ingeniería y Ciencias, Ave. Eugenio Garza Sada 2501, Monterrey, 64849 Nuevo León, Mexico; a00824173@itesm.mx (O.C.-C.); sarnunez@uv.mx (S.N.-C.); enrique.alopezg@tec.mx (E.A.L.-G.)

<sup>2</sup> Tecnológico de Estudios Superiores de Coacalco. 16 de septiembre 54, Col. Cabecera municipal, Coacalco de Berriozabal, 55700 Estado de México, Mexico.

<sup>3</sup> ESIQIE, Instituto Politécnico Nacional, Av. Instituto Politécnico Nacional s/n, Col. Zacatenco, 07738 Ciudad de México, Mexico; jwang@ipn.mx

<sup>4</sup> Facultad de Ciencias Químicas, Universidad Veracruzana, Campus Coatzacoalcos, 96538 Veracruz, Mexico.

\* Correspondence: jgon88@hotmail.com (J.G.-G.); lchen@ipn.mx (L.C.); alejandro\_montesinos@tec.mx (A.M.-C.)

**Table S1.** Atomic Fractional Coordinates of the different Crystalline Structures.

| Compound                                      | Atom | Site | x       | y      | z       |
|-----------------------------------------------|------|------|---------|--------|---------|
| CaO                                           | Ca   | 4a   | 0.0000  | 0.0000 | 0.0000  |
|                                               | O    | 4b   | 0.5000  | 0.5000 | 0.5000  |
| Ca(OH) <sub>2</sub>                           | Ca   | 1a   | 0.0000  | 0.0000 | 0.0000  |
|                                               | O    | 2d   | 0.3333  | 0.6667 | 0.2346  |
|                                               | H    | 2d   | 0.3333  | 0.6667 | 0.4280  |
| MgO                                           | Mg   | 4a   | 0.0000  | 0.0000 | 0.0000  |
|                                               | O    | 4b   | 0.5000  | 0.5000 | 0.5000  |
| CaCO <sub>3</sub> (Trigonal R-3c:H)           | Ca   | 6b   | 0.0000  | 0.0000 | 0.0000  |
|                                               | C    | 6a   | 0.0000  | 0.0000 | 0.2500  |
|                                               | O    | 18e  | 0.2500  | 0.0000 | 0.2500  |
| CaCO <sub>3</sub> (Orthorhombic Pbnm)         | Ca   | 4a   | 0.0000  | 0.0000 | 0.0000  |
|                                               | C    | 4c   | 0.0794  | 0.6460 | 0.2500  |
|                                               | O1   | 4c   | 0.3722  | 0.5890 | 0.2500  |
|                                               | O2   | 8d   | -0.0552 | 0.6678 | 0.1219  |
| CaCO <sub>3</sub> (Orthorhombic Pmcn)         | Ca   | 4c   | 0.2500  | 0.4141 | 0.7538  |
|                                               | C    | 4c   | 0.2500  | 0.7662 | 0.0000  |
|                                               | O1   | 4c   | 0.2500  | 0.9187 | 0.0000  |
|                                               | O2   | 8d   | 0.4733  | 0.6837 | 0.0000  |
| CaSO <sub>4</sub>                             | Ca1  | 4c   | 0.7500  | 0.0000 | 0.3460  |
|                                               | S1   | 4c   | 0.2500  | 0.0000 | 0.1550  |
|                                               | O1   | 8g   | 0.2500  | 0.1710 | 0.0150  |
|                                               | O2   | 8g   | 0.0800  | 0.0000 | 0.2980  |
| Ca <sub>2</sub> P <sub>2</sub> O <sub>7</sub> | Ca1  | 4a   | 0.1374  | 0.2313 | 0.0000  |
|                                               | Ca2  | 4a   | 0.1591  | 0.5447 | 0.2426  |
|                                               | Ca3  | 4a   | 0.7895  | 0.7337 | 0.1380  |
|                                               | Ca4  | 4a   | 0.3627  | 0.1054 | 0.1355  |
|                                               | P1   | 4a   | 0.6213  | 0.3078 | 0.0235  |
|                                               | P2   | 4a   | 0.8673  | 0.2534 | 0.1243  |
|                                               | P3   | 4a   | 0.0463  | 0.7148 | 0.0186  |
|                                               | P4   | 4a   | 0.2873  | 0.6462 | 0.1207  |
|                                               | O1   | 4a   | 0.4607  | 0.1584 | 0.0426  |
|                                               | O2   | 4a   | 0.7727  | 0.1984 | -0.0133 |
|                                               | O3   | 4a   | 0.5303  | 0.4921 | -0.0001 |
|                                               | O4   | 4a   | 0.7395  | 0.3776 | 0.0789  |
|                                               | O5   | 4a   | 0.7364  | 0.0873 | 0.1469  |
|                                               | O6   | 4a   | 0.0519  | 0.1769 | 0.0953  |
|                                               | O7   | 4a   | 0.8994  | 0.4088 | 0.1695  |

|                                               |     |    |        |        |         |
|-----------------------------------------------|-----|----|--------|--------|---------|
|                                               | O8  | 4a | 0.8537 | 0.7907 | 0.0433  |
|                                               | O9  | 4a | 0.1855 | 0.8795 | -0.0011 |
|                                               | O10 | 4a | 0.0229 | 0.5542 | -0.0249 |
|                                               | O11 | 4a | 0.1582 | 0.5873 | 0.0666  |
|                                               | O12 | 4a | 0.3450 | 0.4526 | 0.1474  |
|                                               | O13 | 4a | 0.4622 | 0.7756 | 0.1015  |
|                                               | O14 | 4a | 0.1474 | 0.7722 | 0.1572  |
| Mg <sub>2</sub> P <sub>2</sub> O <sub>7</sub> | Mg1 | 8j | 0.2496 | 0.925  | 0.1212  |
|                                               | Mg2 | 8j | 0.6986 | 0.433  | 0.8286  |
|                                               | P1  | 8j | 0.9479 | 0.764  | 0.7649  |
|                                               | P2  | 8j | 0.5245 | 0.773  | 0.4683  |
|                                               | O1  | 8j | 0.729  | 0.833  | 0.5901  |
|                                               | O2  | 8j | 0.3762 | 0.761  | 0.5513  |
|                                               | O3  | 8j | 1.1276 | 0.769  | 0.6999  |
|                                               | O4  | 8j | 1.0113 | 0.907  | 0.8953  |
|                                               | O5  | 8j | 0.9236 | 0.596  | 0.8287  |
|                                               | O6  | 8j | 0.471  | 0.897  | 0.3203  |
|                                               | O7  | 8j | 0.5998 | 0.606  | 0.4192  |

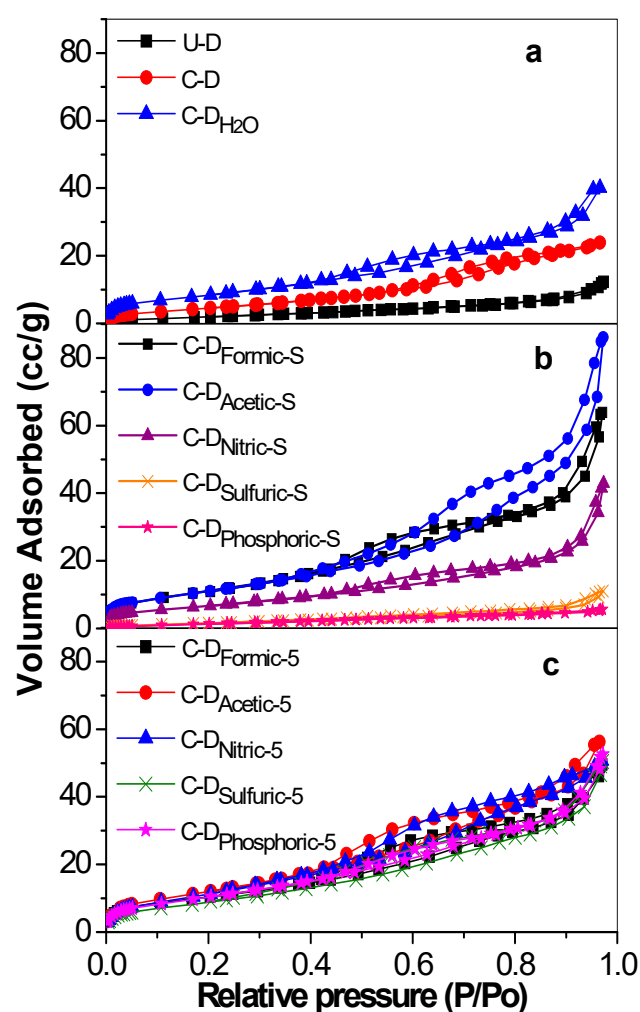

**Figure S1.** N<sub>2</sub> adsorption-desorption isotherms of (a) samples U-D, C-D, and C-D<sub>H2O</sub>, (b) calcined samples treated by stoichiometric ratios of different acids, and (c) samples treated at pH =5.
